# Supplementary material for: Using potassium bromide pellets and optical spectroscopy to assess the photodimerization of two trans-(trifluoromethyl)-cinnamic acid compounds
Source: Royal Society of Chemistry journal article supplement (doi:10.1039/d4ce00205a), 2024-01-01
Supplement: d4ce00205a1.pdf [file d4ce00205a1.pdf]

## SUPPORTING INFORMATION

### **Using potassium bromide pellets and optical spectroscopy to assess the photodimerization of two *trans*-(Trifluoromethyl)-cinnamic acid compounds.**

Bayasgalan Ulambayar<sup>a</sup>, Khongorzul Batchuluun<sup>a‡</sup>, Chantsalnyam Bariashir<sup>a,b</sup>, Nergui Uranbileg<sup>a,c</sup>, Felix J. Stammer<sup>d</sup>, Jav Davaasambuu<sup>e,f</sup>, and Tobias E. Schrader<sup>g‡</sup>

<sup>a</sup>Institute of Chemistry and Chemical Technology, Mongolian Academy of Sciences, 13330 Ulaanbaatar, Mongolia.

<sup>b</sup>Energy Science and Engineering, Daegu Gyeongbuk Institute of Science & Technology, Daegu, Republic of Korea.

<sup>c</sup>Department of Chemical Engineering, Pohang University of Science and Technology (POSTECH) Pohang 37673, Republic of Korea.

<sup>d</sup>Physical and Biophysical Chemistry, Bielefeld University, 33615 Bielefeld, Germany.

<sup>e</sup>Institute of Physics and Technology, Mongolian Academy of Sciences, 13330 Ulaanbaatar, Mongolia.

<sup>f</sup>Laser Research Center, National University of Mongolia, 14201 Ulaanbaatar, Mongolia

<sup>g</sup>Forschungszentrum Jülich, Jülich Centre for Neutron Science at Heinz Maier-Leibnitz Zentrum (MLZ), Lichtenbergstr. 1, 85747 Garching, Germany.

#### **Contents:**

|                             |     |
|-----------------------------|-----|
| Materials and methods ..... | 1   |
| Supporting Tables .....     | 2   |
| Supporting Figures .....    | 3-6 |

## Materials and methods

FTIR spectra of *trans*-3-(trifluoromethyl) cinnamic acid (3-tfmca) and *trans*-4-(trifluoromethyl) cinnamic acid (4-tfmca) were recorded on a Perkin Elmer Spectrum Two spectrophotometer in mineral oil (often called Nujol) and potassium bromide (KBr) pellet in the wavenumber region of 4000-400  $\text{cm}^{-1}$  with a resolution of 1.0  $\text{cm}^{-1}$ . Nujol was purchased from Merk/Sigma Aldrich with product number M3516. It has the CAS No.: 8042-47-5. The thickness of the pellet was around 0.5 mm and the optical path length of the Nujol sample was 0.2 mm defined by a teflon spacer. The powder sample was dispersed in the Nujol as good as possible forming a fairly homogeneous suspension. However, it was difficult to keep a constant concentration in the Nujol case since the powder sample was slowly drifting to the bottom of the cuvette during the measurement. Thermogravimetric analyses were conducted on HITACHI TG/DTA 7300 at a heating rate of 10  $^{\circ}\text{C}/\text{min}$ . Approximately 8 mg of irradiated powders were taken as a sample.

**Table T1.** The crystal data of 3-tfmca, 4-tfmca, and partially photodimerized 4-tfmca after 8 hours of irradiation.

|                                          | <b>3-tfmca</b>                                               | <b>4-tfmca</b>                                               | <b>4-tfmca-8h</b>                                             |
|------------------------------------------|--------------------------------------------------------------|--------------------------------------------------------------|---------------------------------------------------------------|
| Formula                                  | C <sub>10</sub> H <sub>7</sub> F <sub>3</sub> O <sub>2</sub> | C <sub>10</sub> H <sub>7</sub> F <sub>3</sub> O <sub>2</sub> | C <sub>20</sub> H <sub>14</sub> F <sub>6</sub> O <sub>4</sub> |
| Formula weight                           | 216.16                                                       | 216.16                                                       | 432.31                                                        |
| Temperature/K                            | 293(2)                                                       | 293(2)                                                       | 293(2)                                                        |
| Crystal system                           | monoclinic                                                   | triclinic                                                    | triclinic                                                     |
| Space group                              | P2 <sub>1</sub> /c                                           | P $\bar{1}$                                                  | P $\bar{1}$                                                   |
| a, Å                                     | 14.3911(9)                                                   | 7.8672(5)                                                    | 7.8930(5)                                                     |
| b, Å                                     | 4.9722(3)                                                    | 7.9953(6)                                                    | 8.2222(6)                                                     |
| c, Å                                     | 13.1778(8)                                                   | 14.9972(11)                                                  | 14.6037(12)                                                   |
| $\alpha$ , °                             | 90                                                           | 91.368(6)                                                    | 89.860(6)                                                     |
| $\beta$ , °                              | 91.829(6)                                                    | 93.753(5)                                                    | 88.678(6)                                                     |
| $\gamma$ , °                             | 90                                                           | 94.796(5)                                                    | 82.349(6)                                                     |
| Volume, Å <sup>3</sup>                   | 942.46(10)                                                   | 937.61(12)                                                   | 939.06(12)                                                    |
| Z                                        | 4                                                            | 4                                                            | 2                                                             |
| $\rho_{\text{calc}}$ , g/cm <sup>3</sup> | 1.523                                                        | 1.531                                                        | 1.529                                                         |
| $\mu$ , mm <sup>-1</sup>                 | 0.144                                                        | 0.145                                                        | 0.144                                                         |
| F(000)                                   | 440.0                                                        | 440.0                                                        | 440.0                                                         |
| Measured reflections                     | 9129                                                         | 30088                                                        | 14300                                                         |
| Independent reflections                  | 1915                                                         | 5732                                                         | 3763                                                          |
| R(int)                                   | 0.0438                                                       | 0.0293                                                       | 0.0408                                                        |
| Goodness-of-fit on F <sup>2</sup>        | 1.106                                                        | 1.071                                                        | 1.049                                                         |
| Final R indexes [ $I \geq 2\sigma(I)$ ]  | R <sub>1</sub> = 0.0584, wR <sub>2</sub> = 0.1356            | R <sub>1</sub> = 0.0498, wR <sub>2</sub> = 0.1529            | R <sub>1</sub> = 0.0905, wR <sub>2</sub> = 0.2737             |
| Final R indexes [all data]               | R <sub>1</sub> = 0.0808, wR <sub>2</sub> = 0.1474            | R <sub>1</sub> = 0.0757, wR <sub>2</sub> = 0.1710            | R <sub>1</sub> = 0.1446, wR <sub>2</sub> = 0.3230             |
| CCDC deposition number                   | 2331099                                                      | 2331642                                                      | 2332753                                                       |

Table T1 gives an overview of the single crystal data. It links the numbers of the structures published in the Cambridge Structural Database (CCDC) with the two compounds under investigation, 3-tfmca and 4-tfmca.

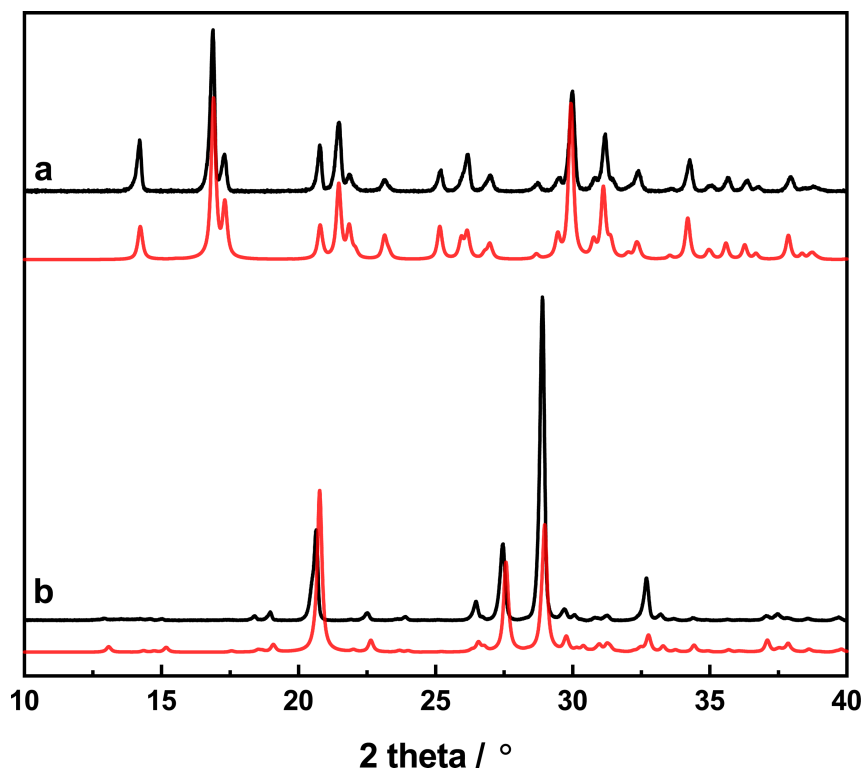

**Figure S1.** Experimental (black line) and calculated (red line) X-ray diffraction patterns for (a) 3-tfmca and (b) 4-tfmca.

Figure S1 is intended to link the powder data to the single crystal data. The measured powder patterns are compared with the ones calculated from the single crystal data using the software Mercury provided by the website of the Cambridge Crystallographic Data Centre (CCDC).

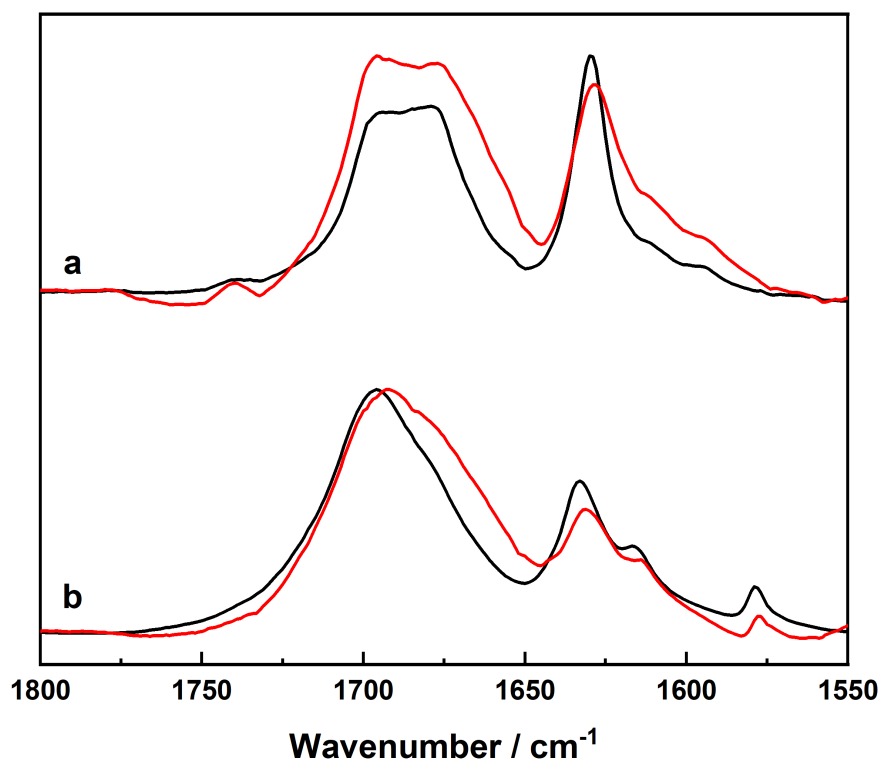

**Figure S2.** FTIR spectra of (a) 3-tfmca and (b) 4-tfmca recorded in KBr pellet (black line) and Nujol (red line).

Figure S2 shows the infrared absorption spectra of the 3-tfmca (part a) and the 4-tfmca (part b) compound measured in the potassium bromide pellet (black line) and in Nujol, in a red line. Good agreement between the infrared spectra in the two different environments, potassium bromide and Nujol shows that the residual pressure in the pellet does not change the vibrational structure of the molecules in it considerably. We attribute the observed changes more to the effects of the different dielectric constants of the two dispersants.

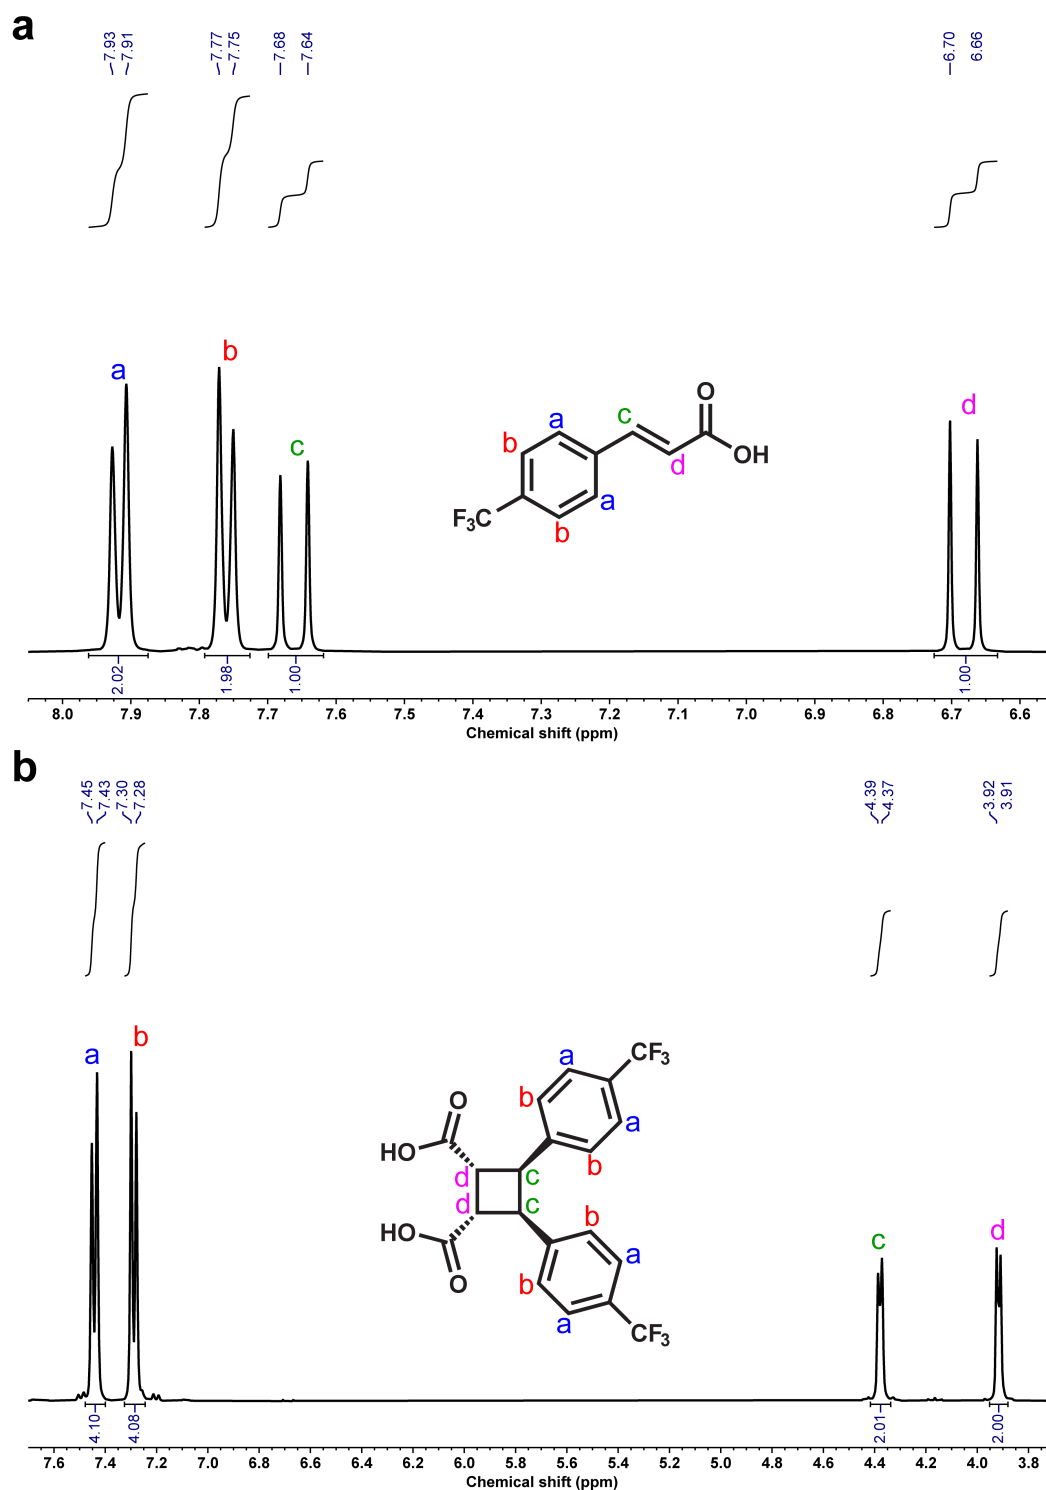

**Figure S3.**  $^1\text{H}$  NMR spectra of (a) 4-tfmca and (b) sample irradiated with mercury xenon lamp for 480 mins.

Figure S3 illustrates the peak assignment of the NMR spectra of the (part a) pristine 4-tfmca powder and (part b) irradiated 4-tfmca powder. Basic data treatment processes such as phasing, baseline correction, chemical shift referencing, peak picking, and peak integration were performed with MestReNova v14.2.1-27684 software.

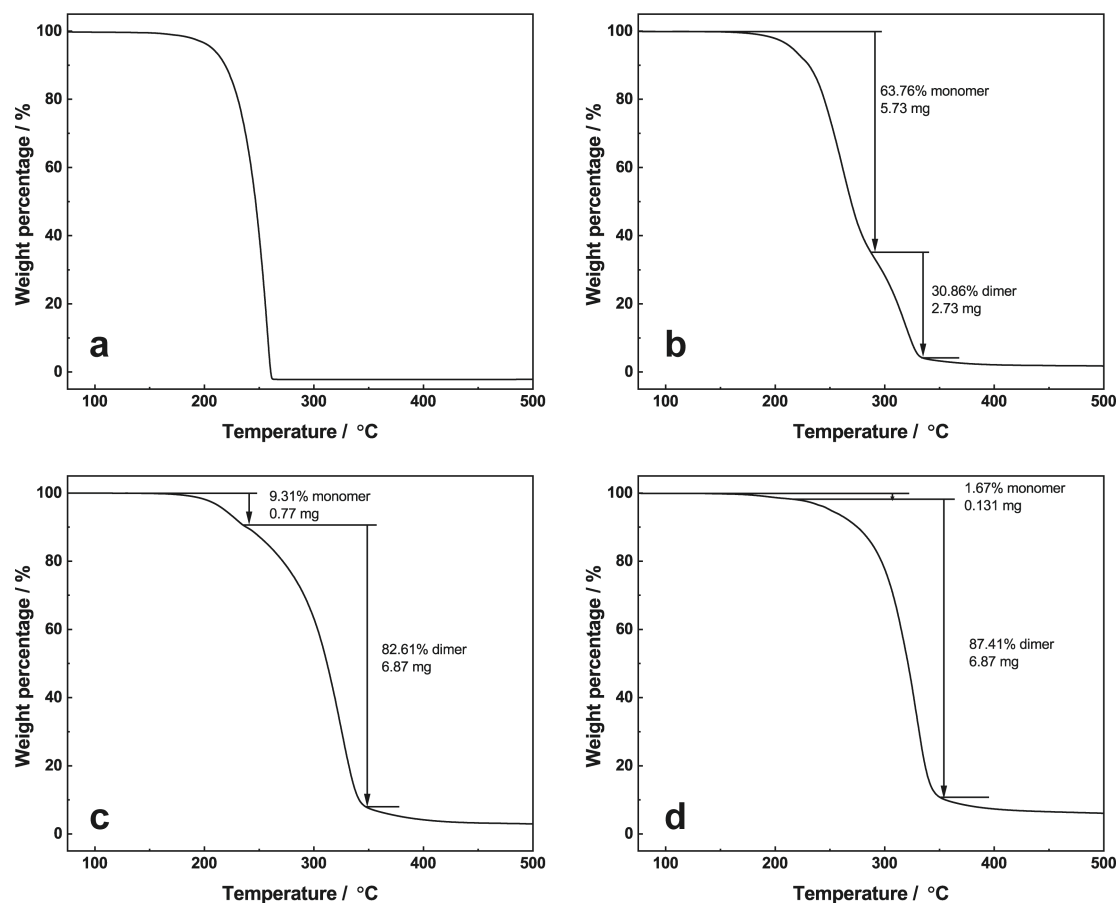

**Figure S4.** TG plots of (a) 4-tfmca and samples irradiated with mercury xenon lamp for (b) 180, (c) 360 and (d) 480 mins.

Figure S4 displays a series of thermogravimetric plots of 4-tfmca after UV irradiation (0, 180, 360, 480 mins) with each plot representing the mass loss % of the sample as a function of temperature, providing the estimate of the progress of the reaction, and to the conversion yield (in mass %). Because the decomposition of both reactant 4-tfmca and the product 4,4'-ditrifluoromethyl- $\beta$ -truxinic acid is not clearly separated the conversion yields shown in the plots are only rough estimates.
